# Supplementary material
Source: PubMed Central journal article supplement (PMC3714117)

**checkCIF/PLATON report**

You have not supplied any structure factors. As a result the full set of tests cannot be run.

No syntax errors found.      CIF dictionary      Interpreting this report

**Datablock: I**

|                 |                            |                         |              |
|-----------------|----------------------------|-------------------------|--------------|
| Bond precision: | C-C = 0.0293 Å             | Wavelength=0.71073      |              |
| Cell:           | a=15.984(9)                | b=20.991(12)            | c=26.596(16) |
|                 | alpha=90                   | beta=101.21(2)          | gamma=90     |
| Temperature:    | 100 K                      |                         |              |
|                 | Calculated                 | Reported                |              |
| Volume          | 8753(9)                    | 8753(9)                 |              |
| Space group     | C 2/c                      | C 2/c                   |              |
| Hall group      | -C 2yc                     | -C 2yc                  |              |
|                 | C20 H40 N6 S2, 5(H2 O4 P), |                         |              |
| Moiety formula  | H2.01 O2.52 P0.51, H2      | C20 H58.51 N6 O26 P6 S2 |              |
|                 | O1.98 P0.49, 0             |                         |              |
| Sum formula     | C20 H58.51 N6 O26 P6 S2    | C20 H58.51 N6 O26 P6 S2 |              |
| Mr              | 1049.10                    | 1049.10                 |              |
| Dx,g cm-3       | 1.592                      | 1.592                   |              |
| Z               | 8                          | 8                       |              |
| Mu (mm-1)       | 0.434                      | 0.434                   |              |
| F000            | 4404.1                     | 4404.1                  |              |
| F000'           | 4413.08                    |                         |              |
| h,k,lmax        | 14,19,24                   | 14,19,24                |              |
| Nref            | 3650                       | 3647                    |              |
| Tmin,Tmax       | 0.823,0.844                | 0.825,0.846             |              |
| Tmin'           | 0.823                      |                         |              |

Correction method= MULTI-SCAN

Data completeness= 0.999      Theta(max)= 19.210

R(reflections)= 0.1513( 3387)      wR2(reflections)= 0.4086( 3647)

S = 1.347      Npar= 606

The following ALERTS were generated. Each ALERT has the format

**test-name\_ALERT\_alert-type\_alert-level.**

Click on the hyperlinks for more details of the test.

** Alert level A**

THETM01\_ALERT\_3\_A The value of sine(theta\_max)/wavelength is less than 0.550

Calculated  $\sin(\theta_{\max})/\lambda = 0.4629$

|                   |                                                       |       |       |
|-------------------|-------------------------------------------------------|-------|-------|
| PLAT023_ALERT_3_A | Resolution (too) Low [ $\sin(\theta)/\lambda < 0.6$ ] | 19.21 | Deg.  |
| PLAT031_ALERT_4_A | Refined Extinction Parameter within Range             | 0.000 | Sigma |
| PLAT245_ALERT_2_A | U(iso) H3S1 Smaller than U(eq) O5S by                 | 0.320 | AngSq |
| PLAT305_ALERT_2_A | Isolated Hydrogen Atom (Outside Bond Range ??)        | H3F   |       |
| PLAT305_ALERT_2_A | Isolated Hydrogen Atom (Outside Bond Range ??)        | H4F   |       |
| PLAT316_ALERT_2_A | Too many H on C in C=N Moiety in Main Residue         | C3    |       |
| PLAT355_ALERT_3_A | Long O-H Bond (0.82A) O3A - H3AO                      | 1.15  | Ang.  |
| PLAT417_ALERT_2_A | Short Inter D-H..H-D H1G .. H14A                      | 1.62  | Ang.  |
| PLAT430_ALERT_2_A | Short Inter D...A Contact O1E .. O2E                  | 2.37  | Ang.  |
| PLAT430_ALERT_2_A | Short Inter D...A Contact O2B .. O2B                  | 2.42  | Ang.  |
| PLAT430_ALERT_2_A | Short Inter D...A Contact O2D .. O2D                  | 2.33  | Ang.  |
| PLAT721_ALERT_1_A | Bond Calc 0.84000, Rep 0.91370 Dev...                 | 0.07  | Ang.  |
|                   | O2G -H2G 1.555 1.555 #                                | 113   |       |
| PLAT722_ALERT_1_A | Angle Calc 109.00, Rep 117.00 Dev...                  | 8.00  | Deg.  |
|                   | P1G -O2G -H2G 1.555 1.555 1.555 #                     | 194   |       |

### Alert level B

DIFMN02\_ALERT\_2\_B The minimum difference density is  $< -0.1 \cdot Z_{\max} \cdot 1.00$   
 \_refine\_diff\_density\_min given = -1.680  
 Test value = -1.600

DIFMX01\_ALERT\_2\_B The maximum difference density is  $> 0.1 \cdot Z_{\max} \cdot 1.00$   
 \_refine\_diff\_density\_max given = 1.868  
 Test value = 1.600

REFNR01\_ALERT\_3\_B Ratio of reflections to parameters is  $< 8$  for a centrosymmetric structure  
 $\sin(\theta)/\lambda$  0.4629  
 Proportion of unique data used 1.0000  
 Ratio reflections to parameters 6.0182

RFACG01\_ALERT\_3\_B The value of the R factor is  $> 0.15$   
 R factor given 0.151

RFACR01\_ALERT\_3\_B The value of the weighted R factor is  $> 0.35$   
 Weighted R factor given 0.409

|                   |                                                 |            |
|-------------------|-------------------------------------------------|------------|
| PLAT084_ALERT_2_B | High wR2 Value                                  | 0.41       |
| PLAT088_ALERT_3_B | Poor Data / Parameter Ratio                     | 6.02       |
| PLAT097_ALERT_2_B | Large Reported Max. (Positive) Residual Density | 1.87 eA-3  |
| PLAT098_ALERT_2_B | Large Reported Min. (Negative) Residual Density | -1.68 eA-3 |
| PLAT212_ALERT_2_B | ADP of Atom O5S is N.P.D. or (nearly) 2D        | ?          |
| PLAT212_ALERT_2_B | ADP of Atom O1S is N.P.D. or (nearly) 2D        | ?          |
| PLAT220_ALERT_2_B | Large Non-Solvent C Ueq(max)/Ueq(min)           | 4.7 Ratio  |
| PLAT241_ALERT_2_B | Check High Ueq as Compared to Neighbors for     | C3         |
| PLAT340_ALERT_3_B | Low Bond Precision on C-C Bonds                 | 0.0293 Ang |
| PLAT415_ALERT_2_B | Short Inter D-H..H-X H2B .. H2G                 | 2.06 Ang.  |
| PLAT417_ALERT_2_B | Short Inter D-H..H-D H1G .. H3EO                | 1.92 Ang.  |
| PLAT420_ALERT_2_B | D-H Without Acceptor >O1G - >H1G                | ?          |
| PLAT420_ALERT_2_B | D-H Without Acceptor <O4F - H4F                 | ?          |
| PLAT420_ALERT_2_B | D-H Without Acceptor O3D - H3DO                 | ?          |
| PLAT420_ALERT_2_B | D-H Without Acceptor *O2S - H1S2                | ?          |
| PLAT420_ALERT_2_B | D-H Without Acceptor *O5S - H3S1                | ?          |
| PLAT430_ALERT_2_B | Short Inter D...A Contact O1B .. O1D            | 2.61 Ang.  |
| PLAT480_ALERT_4_B | Long H...A H-Bond Reported H1SB .. O2C          | 3.05 Ang.  |

### Alert level C

DIFMN03\_ALERT\_1\_C The minimum difference density is  $< -0.1 \cdot Z_{\max} \cdot 0.75$   
 The relevant atom site should be identified.

DIFMX02\_ALERT\_1\_C The maximum difference density is  $> 0.1 \cdot Z_{\max} \cdot 0.75$   
 The relevant atom site should be identified.

|                   |                                                 |      |
|-------------------|-------------------------------------------------|------|
| PLAT042_ALERT_1_C | Calc. and Reported MoietyFormula Strings Differ | ?    |
| PLAT082_ALERT_2_C | High R1 Value                                   | 0.15 |

|                   |                                    |      |                                  |       |       |
|-------------------|------------------------------------|------|----------------------------------|-------|-------|
| PLAT220_ALERT_2_C | Large Non-Solvent                  | N    | Ueq(max)/Ueq(min) ...            | 3.6   | Ratio |
| PLAT222_ALERT_3_C | Large Non-Solvent                  | H    | Uiso(max)/Uiso(min) ..           | 4.7   | Ratio |
| PLAT223_ALERT_4_C | Large Solvent/Anion                | H    | Ueq(max)/Ueq(min) ...            | 3.1   | Ratio |
| PLAT241_ALERT_2_C | Check High                         |      | Ueq as Compared to Neighbors for | C26   |       |
| PLAT242_ALERT_2_C | Check Low                          |      | Ueq as Compared to Neighbors for | N1    |       |
| PLAT242_ALERT_2_C | Check Low                          |      | Ueq as Compared to Neighbors for | C2    |       |
| PLAT244_ALERT_4_C | Low 'Solvent'                      |      | Ueq as Compared to Neighbors of  | P1A   |       |
| PLAT244_ALERT_4_C | Low 'Solvent'                      |      | Ueq as Compared to Neighbors of  | P1B   |       |
| PLAT244_ALERT_4_C | Low 'Solvent'                      |      | Ueq as Compared to Neighbors of  | P1C   |       |
| PLAT244_ALERT_4_C | Low 'Solvent'                      |      | Ueq as Compared to Neighbors of  | P1D   |       |
| PLAT244_ALERT_4_C | Low 'Solvent'                      |      | Ueq as Compared to Neighbors of  | P1E   |       |
| PLAT245_ALERT_2_C | U(iso) H1S2                        |      | Smaller than U(eq) O2S by ...    | 0.044 | AngSq |
| PLAT303_ALERT_2_C | Full Occupancy H-Atom              | H3CO | with # Connections               | 2.00  |       |
| PLAT360_ALERT_2_C | Short C(sp3)-C(sp3) Bond           | C2   | - C3 ...                         | 1.39  | Ang.  |
| PLAT360_ALERT_2_C | Short C(sp3)-C(sp3) Bond           | C25  | - C26 ...                        | 1.43  | Ang.  |
| PLAT395_ALERT_2_C | Deviating X-O-Y Angle from 120 Deg |      | for *O2S                         | 143.3 | Deg.  |
| PLAT417_ALERT_2_C | Short Inter D-H..H-D               | H4BO | .. H4A ..                        | 2.13  | Ang.  |
| PLAT417_ALERT_2_C | Short Inter D-H..H-D               | H3F  | .. H3EO ..                       | 2.12  | Ang.  |
| PLAT420_ALERT_2_C | D-H Without Acceptor               | N1   | - H1B ...                        | ?     |       |
| PLAT420_ALERT_2_C | D-H Without Acceptor               | N11  | - H11A ...                       | ?     |       |
| PLAT420_ALERT_2_C | D-H Without Acceptor               | N24  | - H24B ...                       | ?     |       |
| PLAT480_ALERT_4_C | Long H...A H-Bond Reported         | H3CO | .. S2 ..                         | 2.96  | Ang.  |
| PLAT480_ALERT_4_C | Long H...A H-Bond Reported         | H1SA | .. S1 ..                         | 2.93  | Ang.  |
| PLAT482_ALERT_4_C | Small D-H..A Angle Rep for         | O1S  | .. O2C ..                        | 99.20 | Deg.  |

### Alert level G

CELLZ01\_ALERT\_1\_G Difference between formula and atom\_site contents detected.  
 CELLZ01\_ALERT\_1\_G ALERT: check formula stoichiometry or atom site occupancies.  
 From the CIF: \_cell\_formula\_units\_Z 8  
 From the CIF: \_chemical\_formula\_sum C20 H58.51 N6 O26 P6 S2  
 TEST: Compare cell contents of formula and atom\_site data

| atom | Z*formula | cif sites | diff  |
|------|-----------|-----------|-------|
| C    | 160.00    | 160.00    | 0.00  |
| H    | 468.08    | 468.10    | -0.02 |
| N    | 48.00     | 48.00     | 0.00  |
| O    | 208.00    | 207.95    | 0.05  |
| P    | 48.00     | 48.00     | 0.00  |
| S    | 16.00     | 16.00     | 0.00  |

|                   |                                                  |            |
|-------------------|--------------------------------------------------|------------|
| PLAT002_ALERT_2_G | Number of Distance or Angle Restraints on AtSite | 9          |
| PLAT003_ALERT_2_G | Number of Uiso or Uij Restrained Atom Sites .... | 63         |
| PLAT005_ALERT_5_G | No _iucr_refine_instructions_details in CIF .... | ?          |
| PLAT007_ALERT_5_G | Note: Number of Unrefined D-H Atoms .....        | 30         |
| PLAT072_ALERT_2_G | SHELXL First Parameter in WGHT Unusually Large.  | 0.18       |
| PLAT083_ALERT_2_G | SHELXL Second Parameter in WGHT Unusually Large. | 240.00     |
| PLAT302_ALERT_4_G | Note: Anion/Solvent Disorder .....               | 20 Perc.   |
| PLAT432_ALERT_2_G | Short Inter X...Y Contact O2G .. C26 ..          | 2.98 Ang.  |
| PLAT432_ALERT_2_G | Short Inter X...Y Contact O4E .. C3 ..           | 2.98 Ang.  |
| PLAT720_ALERT_4_G | Number of Unusual/Non-Standard Labels .....      | 15         |
| PLAT779_ALERT_4_G | Suspect or Irrelevant (Bond) Angle in CIF .... # | 159        |
|                   | O3C -P1C -H3CO 1.555 1.555 1.555                 | 28.80 Deg. |
| PLAT860_ALERT_3_G | Note: Number of Least-Squares Restraints .....   | 293        |

14 **ALERT level A** = Most likely a serious problem - resolve or explain  
 23 **ALERT level B** = A potentially serious problem, consider carefully  
 28 **ALERT level C** = Check. Ensure it is not caused by an omission or oversight  
 14 **ALERT level G** = General information/check it is not something unexpected

7 ALERT type 1 CIF construction/syntax error, inconsistent or missing data

46 ALERT type 2 Indicator that the structure model may be wrong or deficient  
10 ALERT type 3 Indicator that the structure quality may be low  
14 ALERT type 4 Improvement, methodology, query or suggestion  
2 ALERT type 5 Informative message, check

---

## checkCIF publication errors

---

### Alert level A

PUBL006\_ALERT\_1\_A \_publ\_requested\_journal is missing  
e.g. 'Acta Crystallographica Section C'  
PUBL008\_ALERT\_1\_A \_publ\_section\_title is missing. Title of paper.  
PUBL012\_ALERT\_1\_A \_publ\_section\_abstract is missing.  
Abstract of paper in English.

---

### Alert level G

PUBL013\_ALERT\_1\_G The \_publ\_section\_comment (discussion of study) is  
missing. This is required for a full paper submission (but is  
optional for an electronic paper).  
PUBL017\_ALERT\_1\_G The \_publ\_section\_references section is missing or  
empty.

---

3 **ALERT level A** = Data missing that is essential or data in wrong format  
2 **ALERT level G** = General alerts. Data that may be required is missing

---

## Publication of your CIF

You should attempt to resolve as many as possible of the alerts in all categories. Often the minor alerts point to easily fixed oversights, errors and omissions in your CIF or refinement strategy, so attention to these fine details can be worthwhile. In order to resolve some of the more serious problems it may be necessary to carry out additional measurements or structure refinements. However, the nature of your study may justify the reported deviations from journal submission requirements and the more serious of these should be commented upon in the discussion or experimental section of a paper or in the "special\_details" fields of the CIF. *checkCIF* was carefully designed to identify outliers and unusual parameters, but every test has its limitations and alerts that are not important in a particular case may appear. Conversely, the absence of alerts does not guarantee there are no aspects of the results needing attention. It is up to the individual to critically assess their own results and, if necessary, seek expert advice.

If level A alerts remain, which you believe to be justified deviations, and you intend to submit this CIF for publication in Acta Crystallographica Section C or Section E, you should additionally insert an explanation in your CIF using the Validation Reply Form (VRF) below. Your explanation will be considered as part of the review process.

If you intend to submit to another section of Acta Crystallographica or Journal of Applied Crystallography or Journal of Synchrotron Radiation, you should make sure that at least a basic structural check is run on the final version of your CIF prior to submission.

```

# start Validation Reply Form
_vrf_PUBL006_GLOBAL
;
PROBLEM: _publ_requested_journal is missing
RESPONSE: ...
;
_vrf_PUBL008_GLOBAL
;
PROBLEM: _publ_section_title is missing. Title of paper.
RESPONSE: ...
;
_vrf_PUBL012_GLOBAL
;
PROBLEM: _publ_section_abstract is missing.
RESPONSE: ...
;
_vrf_THETM01_I
;
PROBLEM: The value of sine(theta_max)/wavelength is less than 0.550
RESPONSE: ...
;
_vrf_PLAT023_I
;
PROBLEM: Resolution (too) Low [sin(theta)/Lambda < 0.6]..          19.21 Deg.
RESPONSE: ...
;
_vrf_PLAT031_I
;
PROBLEM: Refined Extinction Parameter within Range .....          0.000 Sigma
RESPONSE: ...
;
_vrf_PLAT245_I
;
PROBLEM: U(iso) H3S1      Smaller than U(eq) O5S      by ...          0.320 AngSq
RESPONSE: ...
;
_vrf_PLAT305_I
;
PROBLEM: Isolated Hydrogen Atom (Outside Bond Range ??)          H3F
RESPONSE: ...
;
_vrf_PLAT316_I
;
PROBLEM: Too many H on C in C=N Moiety in Main Residue ..          C3
RESPONSE: ...
;
_vrf_PLAT355_I
;
PROBLEM: Long      O-H Bond (0.82A)      O3A      -      H3AO      ...          1.15 Ang.
RESPONSE: ...
;
_vrf_PLAT417_I
;
PROBLEM: Short Inter D-H..H-D          H1G      ..      H14A      ..          1.62 Ang.
RESPONSE: ...
;
_vrf_PLAT430_I
;
PROBLEM: Short Inter D...A Contact      O1E      ..      O2E      ..          2.37 Ang.
RESPONSE: ...
;
_vrf_PLAT721_I

```

```

;
PROBLEM: Bond      Calc      0.84000, Rep      0.91370 Dev...      0.07 Ang.
RESPONSE: ...
;
_vrf_PLAT722_I
;
PROBLEM: Angle     Calc      109.00, Rep      117.00 Dev...      8.00 Deg.
RESPONSE: ...
;
# end Validation Reply Form

```

If you wish to submit your CIF for publication in Acta Crystallographica Section C or E, you should upload your CIF via the web. If your CIF is to form part of a submission to another IUCr journal, you will be asked, either during electronic submission or by the Co-editor handling your paper, to upload your CIF via our web site.

**PLATON version of 21/12/2011; check.def file version of 16/12/2011**

Datablock I - ellipsoid plot

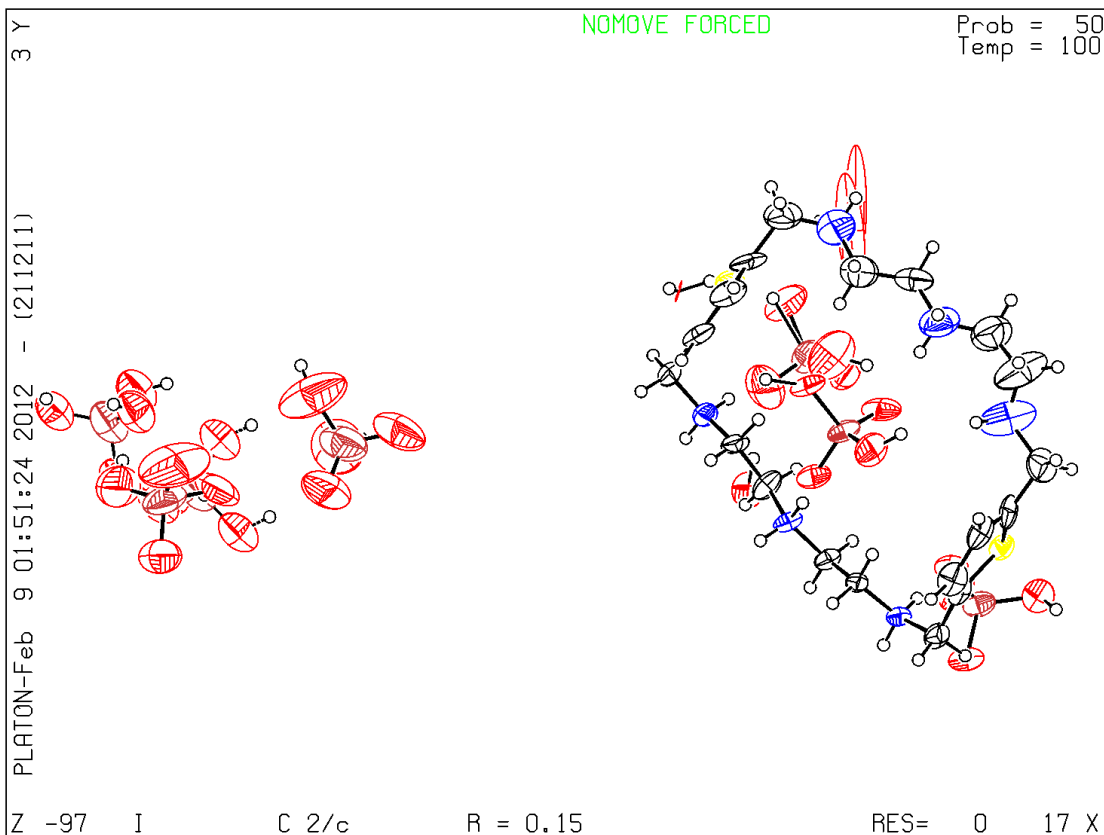

Supplement: NIHMS372582-supplement-01.pdf [file NIHMS372582-supplement-01.pdf]
